# Supplementary material for: Frequency modulated microrheology
Source: Royal Society of Chemistry journal article supplement (doi:10.1039/c5lc00351b), 2015-01-01
Supplement: c5lc00351b1.pdf [file c5lc00351b1.pdf]

# Frequency modulated microrheology - Supporting Information

Matthew M. Shindel and Eric M. Furst

## Collagen rheology

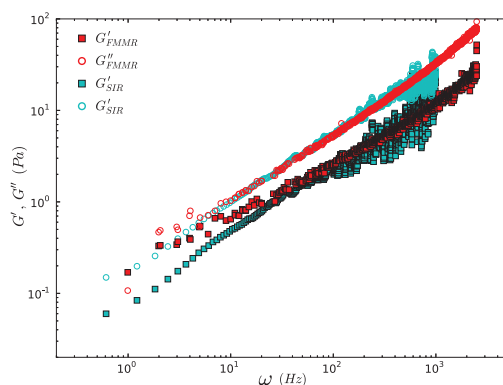

Figure 1: Recombinant collagen complex modulus measured by FMMR and SIR. Measurements were performed 45 hours after incubating with a bifunctional cross-linker.

## FMMR measurement range

The FM input can be decomposed into a linear superposition of sinusoids, each with amplitude  $A$ . Neglecting inertial effects, the response of a particle trapped in a viscoelastic medium to each component of the driving force has the form

$$w(t) = D(\omega) \cos(\omega t + \delta(\omega)) \quad (1)$$

The amplitude and phase-lag of the time-dependent displacement from the optical trap are

$$D(\omega) = A \left( 1 - \frac{\xi}{\sqrt{(\xi + G'/3)^2 + G''^2}} \right) \quad (2)$$

and

$$\tan(\delta) = \frac{G''}{\xi + G'/3} \quad (3)$$

$G'$  and  $G''$  are the storage and loss moduli of the medium, respectively. The optical trap's characteristic elasticity,  $\xi = \frac{\kappa}{6\pi a}$  is a function of trap stiffness,  $\kappa$ , and probe radius,  $a$ .

The work required to drive the probe through the fluid is balanced by the optical potential created by the particle's displacement from the trap. The trapping force is conservative, yielding a potential with the form  $\frac{\kappa \langle r'^2 \rangle}{2}$ , where the effective mean-square displacement (msd)  $\langle r'^2 \rangle$ , contains contributions from both the deterministic sinusoidal driving force (  $\frac{D^2}{2}$  ) and the stochastic thermal force (  $\langle r^2 \rangle$  ).

$$\frac{\kappa}{2} \left( \frac{D^2}{2} + \langle r^2 \rangle \right) = Ga(A - D)^2 \quad (4)$$

The smallest detectable displacement is set by the detector resolution,  $s$ . The minimum measurable shear modulus is therefore

$$G = \frac{1}{2(A-s)^2} \left( 3\pi\xi s^2 + \frac{k_B T}{a} \right) \quad (5)$$

Alternatively, the largest modulus ( $D \gg \langle r^2 \rangle^{\frac{1}{2}}$ ) that can be measured is

$$G = \frac{3\pi\xi}{2} \left( \frac{A}{s} - 1 \right)^2 \quad (6)$$
